# Supplementary material
Source: PubMed Central journal article supplement (PMC6842848)
Supplement: rspb20191579supp1.pdf [file rspb20191579supp1.pdf]

**Supporting Information – Appendix S1.** Geographic information collected for each locality, and local and broad scale predictors considered in the analyses. n/a= not applicable.

Mammola *et al.* Disentangling the contribution of local versus broad scale environmental drivers of continental beta diversity patterns in subterranean spider communities.

| Variable name                    | Description                                                                                                                                                                                                                                                                                       | Type of variable      | Analyzed | Reason for exclusion                                                     |
|----------------------------------|---------------------------------------------------------------------------------------------------------------------------------------------------------------------------------------------------------------------------------------------------------------------------------------------------|-----------------------|----------|--------------------------------------------------------------------------|
| Locality name                    | Name of the cave/subterranean locality                                                                                                                                                                                                                                                            | Geographic descriptor | n/a      | n/a                                                                      |
| Cadaster code                    | Speleological cadastre number of the cave, if available                                                                                                                                                                                                                                           | Geographic descriptor | n/a      | n/a                                                                      |
| Toponym                          | Geographic information about the locality (e.g. name of the city, hamlet, mountain massif in which the locality occur)                                                                                                                                                                            | Geographic descriptor | n/a      | n/a                                                                      |
| x                                | Longitude in WSG84 decimal degrees                                                                                                                                                                                                                                                                | Geographic descriptor | n/a      | n/a                                                                      |
| y                                | Latitude in WSG84 decimal degrees                                                                                                                                                                                                                                                                 | Geographic descriptor | n/a      | n/a                                                                      |
| Approximation of coordinates     | Error associated with the x and y coordinates                                                                                                                                                                                                                                                     | Geographic descriptor | n/a      | n/a                                                                      |
| Cave development                 | Total development of the cave in meters                                                                                                                                                                                                                                                           | Local scale predictor | yes      | –                                                                        |
| Elevation                        | Altitude of the main cave entrance in meters                                                                                                                                                                                                                                                      | Local scale predictor | no       | Collinear with mean annual temperature                                   |
| Prevalent drop                   | Total positive minus total negative drop                                                                                                                                                                                                                                                          | Local scale predictor | yes      | –                                                                        |
| N° of entrances                  | The number of known entrances                                                                                                                                                                                                                                                                     | Local scale predictor | yes      | –                                                                        |
| Main entrance size               | A numeric estimation (i.e. base x height) of the dimension of the main entrance in meters                                                                                                                                                                                                         | Local scale predictor | yes      | –                                                                        |
| Entrance habitat                 | Categorical: either forest, shrubs, grass, rocky, urbanized, agricultural                                                                                                                                                                                                                         | Local scale predictor | no       | Collinear with mean annual temperature                                   |
| Presence of a subterranean river | Categorical: if the cave is active (yes) or not active (no). An active cave is a cave which has a stream flowing in it.                                                                                                                                                                           | Local scale predictor | no       | Unbalance between the levels of the factor                               |
| Type of cave                     | Categorical: either karst (karst caves, doline, etc.), tectonic (talus caves, cracks, faults, etc.), volcanic (volcanic caves, lava tubes, etc.), ice (ice caves), ialine (ialine caves), artificial (e.g. mine, mineshafts, military bunkers, railways, subterranean blockhouses, cellars, etc.) | Local scale predictor | no       | Collinear with Karst area and unbalance between the levels of the factor |
| Geological substrate             | Categorical: The lithotype/geological substrate of the cave                                                                                                                                                                                                                                       | Local scale predictor | no       | Collinear with Karst area and unbalance between the levels of the factor |
| Touristic use                    | Categorical: if the cave is open to general tourists (yes) or not (no)                                                                                                                                                                                                                            | Local scale predictor | no       | Unbalance between the levels of the factor                               |
| Geographic distance              | Geographic distance between sites, calculated using the x and y coordinates                                                                                                                                                                                                                       | Broad scale predictor | yes      | –                                                                        |
| Karst area                       | Area of the karst patch in which the cave occurs in square kilometers                                                                                                                                                                                                                             | Broad scale predictor | yes      | –                                                                        |
| Cumulative precipitation         | Sum of annual precipitations in millimeters                                                                                                                                                                                                                                                       | Broad scale predictor | yes      | –                                                                        |
| Distance from the LGM glacier    | Distance from the nearest last glacial maximum (LGM) glacier margin                                                                                                                                                                                                                               | Broad scale predictor | yes      | –                                                                        |
| Mean annual temperature          | Mean annual temperature in decimal degrees                                                                                                                                                                                                                                                        | Broad scale predictor | yes      | –                                                                        |
| Annual range of temperature      | Annual range of temperature in decimal degrees                                                                                                                                                                                                                                                    | Broad scale predictor | yes      | –                                                                        |
| Solar radiation                  | Solar radiation at the surface ( $\text{kJ m}^{-2} \text{day}^{-1}$ )                                                                                                                                                                                                                             | Broad scale predictor | no       | Collinear with mean annual temperature                                   |
